# Supplementary material for: Dietary soy and meat proteins induce distinct physiological and gene expression changes in rats
Source: PubMed Central journal article supplement (PMC4746574; doi:10.1038/srep20036), 2016-02-09
Supplement: srep20036-s1.pdf [file srep20036-s1.pdf]

## Online Supplementary Materials

### **Dietary soy and meat proteins induce distinct physiological and gene expression responses in rats**

Shangxin Song<sup>1</sup>, Guido J. Hooiveld<sup>2</sup>, Mengjie Li<sup>1</sup>, Fan Zhao<sup>1</sup>, Wei Zhang<sup>4</sup>, Michael Muller<sup>3</sup>, Chunbao Li<sup>1\*</sup>, Guanghong Zhou<sup>1\*</sup>

<sup>1</sup>Key Laboratory of Meat Processing and Quality Control, MOE; Key Laboratory of Animal Products Processing, MOA; Synergetic Innovation Center of Food Safety and Nutrition; Jiang Synergetic Innovation Center of Meat Processing and Quality Control; Nanjing Agricultural University; Nanjing 210095, P.R. China

<sup>2</sup>Nutrition, Metabolism and Genomics Group, Division of Human Nutrition, Wageningen University, Wageningen, the Netherlands

<sup>3</sup>Norwich Medical School, University of East Anglia Norwich, Norwich, UK

<sup>4</sup>Key Laboratory of Human Function Genomics Jiangsu Province, Nanjing Medical University, Nanjing, 210029, P.R. China

#### **\*Corresponding authors**

Dr. Guanghong Zhou

Address: Weigang 1#, Nanjing, 210095, P.R. China. E-mail: guanghong.zhou@hotmail.com; Tel: 86 25 84395376; Fax: 86 25 84395679

Dr. Chunbao Li

Address: Weigang 1#, Nanjing, 210095, P.R. China. E-mail: chunbao.li@njau.edu.cn; Tel/fax: 86 25 84395679

## Online Supplementary Materials

### **Supplementary Figure S1. Network with all names of gene sets and upstream regulators for liver transcriptome of the rats fed soy and meat proteins compared to the rats fed casein.**

This network was produced by using Cytoscape v3.2 and Enrichment Map plugin v2.1. Nodes represent enriched gene sets in gene set enrichment analysis of liver transcriptome in rat. The node size is proportional to the total number of genes within each gene set (from 15 to 500). The border area of the node represents the comparison of soy protein group to the casein group (Soy vs. Casein), whereas the inner area of the node represents the comparison of meat protein group to the casein group (Meat vs. Casein). The colors of nodes indicate the directions of changes of gene sets with red for up-regulation and blue for down-regulation. The enrichment  $P$  value is mapped to the node color as a color gradient. The color changes from light to bright with the  $P$  value decreasing from 0.05 to 0. The weighted grey lines between the round nodes represent the “overlap” score (Jaccard and overlap coefficients  $>0.375$ ) depending on the number of genes two gene-sets share. The more genes two gene-sets share, the wider the line. The yellow triangles in the map represent the upstream regulators predicted by using Ingenuity Pathway Analysis, and they were overlapped with putative target genes in the genes sets using the Post Analysis tool in the Enrichment Map v2.1 plugin. Pink lines between round nodes and yellow triangles represent the overlap  $P$  value (Fisher’s Exact Test nominal  $P < 0.05$ ) between the enriched gene sets and the upstream regulators. Nodes of high similarity were automatically arranged close together, and circles were semi-automatically annotated and manually labelled.

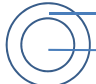

Soy vs. Casein  
Meat vs. Casein

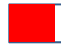

Up Down

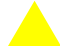

Upstream Regulator

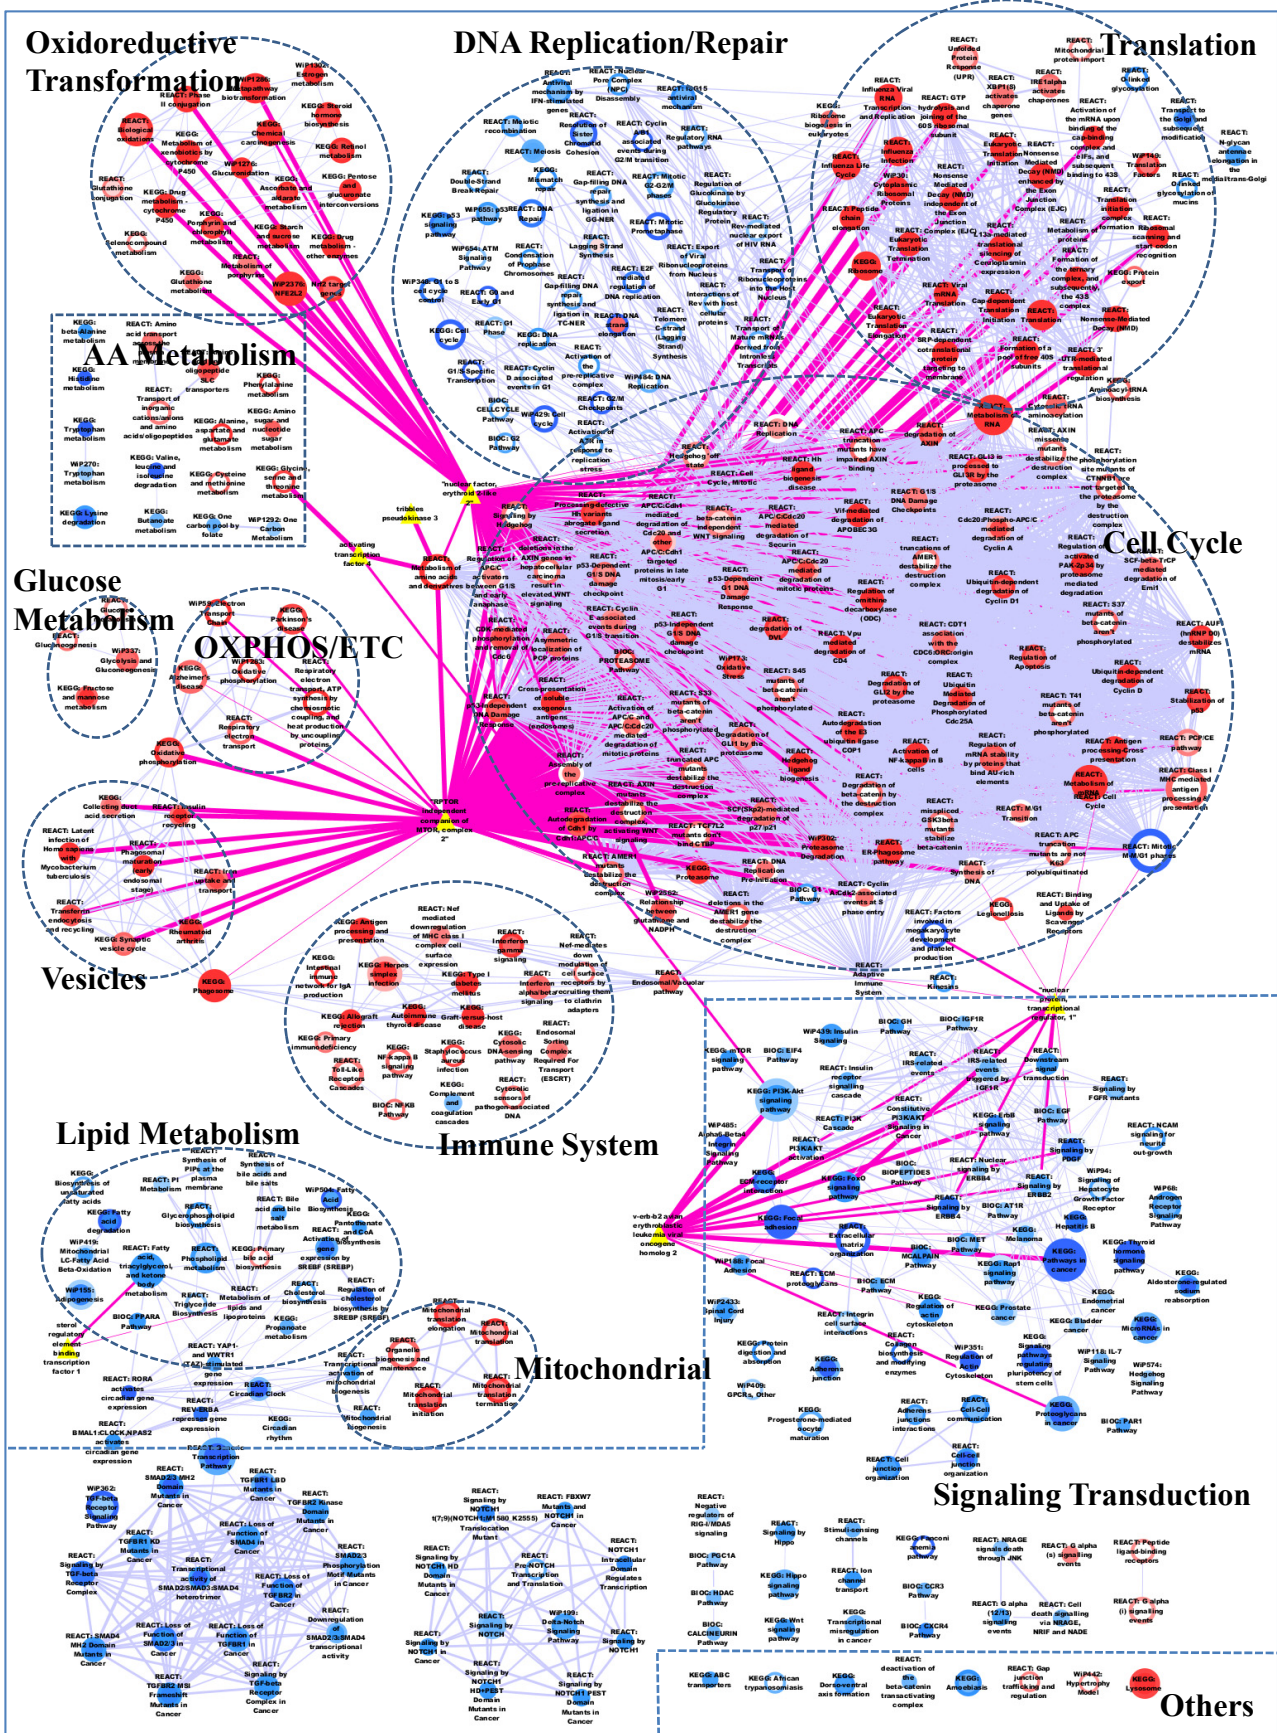

## Online Supplementary Materials

**Supplementary Table S1. All significantly regulated genes ( $P < 0.05$ ) observed in rats after 1 week consumption of the soy and meat protein diets compared to the casein diet.**

Due to the length of Supplemental Table S1, it is available as a separate supplemental Excel file.

**Supplementary Table S2. All significantly gene sets ( $P < 0.05$  &  $FDR < 0.25$ ) obtained from the GSEA analysis of the liver transcriptomic data observed in rats after 1 week consumption of the soy and meat protein diets compared to the casein diet.**

Due to the length of Supplemental Table S2, it is available as a separate supplemental Excel file.

## Online Supplementary Materials

**Supplementary Table S3. The mRNA expression of PPAR target genes in rat livers after 1 week consumption of the soy and meat protein diets compared to the casein diet.**

| Symbol         | Full name                                                          | Soy vs. Casein |      | Meat vs. Casein |         |
|----------------|--------------------------------------------------------------------|----------------|------|-----------------|---------|
|                |                                                                    | FC             | P    | FC              | P       |
| <i>Scd1</i>    | stearoyl-Coenzyme A desaturase 1                                   | -16.80         | 0.24 | -3.56           | 0.060   |
| <i>Txnip</i>   | thioredoxin interacting protein                                    | -13.51         | 0.35 | -11.03          | 0.038   |
| <i>Aqp7</i>    | aquaporin 7                                                        | -6.53          | 0.09 | -3.67           | 0.0042  |
| <i>Fabp5</i>   | fatty acid binding protein 5, epidermal                            | -6.31          | 0.23 | -2.52           | 0.065   |
| <i>Angptl4</i> | angiopoietin-like 4                                                | -5.48          | 0.07 | -6.00           | 0.00089 |
| <i>Fabp1</i>   | fatty acid binding protein 1, liver                                | -4.97          | 0.08 | -2.85           | 0.0053  |
| <i>Ehhadh</i>  | enoyl-Coenzyme A, hydratase/3-hydroxyacyl Coenzyme A dehydrogenase | -4.63          | 0.16 | -3.16           | 0.033   |
| <i>Hprt1</i>   | hypoxanthine phosphoribosyltransferase 1                           | -4.24          | 0.26 | -3.29           | 0.025   |
| <i>Apoc3</i>   | apolipoprotein C-III                                               | -4.21          | 0.15 | -3.68           | 0.0024  |
| <i>Klf10</i>   | kruppel-like factor 10                                             | -4.08          | 0.13 | -2.95           | 0.012   |
| <i>Acadl</i>   | acyl-Coenzyme A dehydrogenase, long-chain                          | -4.08          | 0.14 | -3.05           | 0.010   |
| <i>Acsl3</i>   | acyl-CoA synthetase long-chain family member 3                     | -3.90          | 0.03 | -3.32           | 0.00057 |
| <i>Acsl1</i>   | acyl-CoA synthetase long-chain family member 1                     | -3.82          | 0.14 | -3.37           | 0.0053  |
| <i>Slc27a5</i> | solute carrier family 27 (fatty acid transporter), member 5        | -3.82          | 0.17 | -3.00           | 0.020   |
| <i>Cyp27a1</i> | cytochrome P450, family 27, subfamily a, polypeptide 1             | -3.72          | 0.22 | -3.73           | 0.0083  |
| <i>Etfdh</i>   | electron-transferring-flavoprotein dehydrogenase                   | -3.70          | 0.21 | -2.90           | 0.012   |
| <i>Pten</i>    | phosphatase and tensin homolog                                     | -3.53          | 0.29 | -2.93           | 0.013   |
| <i>Cpt2</i>    | carnitine palmitoyltransferase 2                                   | -3.44          | 0.27 | -3.36           | 0.0059  |
| <i>Apoa1</i>   | apolipoprotein A-I                                                 | -3.43          | 0.23 | -3.01           | 0.010   |
| <i>Cpt1a</i>   | carnitine palmitoyltransferase 1a, liver                           | -3.42          | 0.29 | -3.42           | 0.015   |
| <i>Slc22a5</i> | solute carrier family 22 (organic                                  | -3.32          | 0.27 | -2.52           | 0.066   |

## Online Supplementary Materials

|                 |                                                                                               |       |      |        |        |
|-----------------|-----------------------------------------------------------------------------------------------|-------|------|--------|--------|
|                 | cation/carnitine transporter), member 5                                                       |       |      |        |        |
| <i>Clu</i>      | clusterin                                                                                     | -3.32 | 0.28 | -3.73  | 0.0036 |
| <i>Ppargc1b</i> | peroxisome proliferator-activated<br>receptor gamma, coactivator 1 beta                       | -3.23 | 0.12 | -2.85  | 0.026  |
| <i>Slc27a2</i>  | solute carrier family 27 (fatty acid<br>transporter), member 2                                | -3.17 | 0.18 | -2.71  | 0.011  |
| <i>Acadm</i>    | acyl-Coenzyme A dehydrogenase, C-4<br>to C-12 straight chain                                  | -3.17 | 0.17 | -3.60  | 0.0023 |
| <i>Acs15</i>    | acyl-CoA synthetase long-chain family<br>member 5                                             | -3.15 | 0.19 | -2.50  | 0.039  |
| <i>Ppargc1a</i> | peroxisome proliferator-activated<br>receptor gamma, coactivator 1 alpha                      | -3.15 | 0.15 | -2.35  | 0.077  |
| <i>Eln</i>      | elastin                                                                                       | -3.15 | 0.19 | -2.54  | 0.028  |
| <i>Ech1</i>     | enoyl coenzyme A hydratase 1,<br>peroxisomal                                                  | -3.14 | 0.31 | -2.43  | 0.035  |
| <i>Sirt1</i>    | sirtuin (silent mating type information<br>regulation 2 homolog) 1 ( <i>S. cerevisiae</i> )   | -3.14 | 0.22 | -3.45  | 0.0043 |
| <i>Acox1</i>    | acyl-Coenzyme A oxidase 1, palmitoyl                                                          | -3.12 | 0.15 | -3.39  | 0.0059 |
| <i>B2m</i>      | beta-2 microglobulin                                                                          | -3.03 | 0.33 | -2.70  | 0.022  |
| <i>Hmgcs2</i>   | 3-hydroxy-3-methylglutaryl-Coenzyme<br>A synthase 2 (mitochondrial)                           | -2.99 | 0.22 | -3.32  | 0.0073 |
| <i>Ppara</i>    | peroxisome proliferator activated<br>receptor alpha                                           | -2.96 | 0.30 | -2.82  | 0.027  |
| <i>Ep300</i>    | e1A binding protein p300                                                                      | -2.96 | 0.28 | -4.47  | 0.0052 |
| <i>Fads2</i>    | fatty acid desaturase 2                                                                       | -2.96 | 0.15 | -2.71  | 0.017  |
| <i>Ppard</i>    | peroxisome proliferator-activated<br>receptor delta                                           | -2.95 | 0.21 | -2.95  | 0.010  |
| <i>Actb</i>     | actin, beta                                                                                   | -2.95 | 0.28 | -3.09  | 0.0045 |
| <i>Ilk</i>      | integrin-linked kinase                                                                        | -2.94 | 0.31 | -3.15  | 0.012  |
| <i>Fabp2</i>    | fatty acid binding protein 2, intestinal                                                      | -2.83 | 0.21 | -2.32  | 0.061  |
| <i>Acaa2</i>    | acetyl-Coenzyme A acyltransferase 2                                                           | -2.70 | 0.18 | -2.96  | 0.0053 |
| <i>Mlycd</i>    | malonyl-CoA decarboxylase                                                                     | -2.69 | 0.35 | -3.45  | 0.016  |
| <i>Hif1a</i>    | hypoxia-inducible factor 1, alpha<br>subunit (basic helix-loop-helix<br>transcription factor) | -2.68 | 0.34 | -2.946 | 0.012  |
| <i>Lpin1</i>    | lipin 1                                                                                       | -2.66 | 0.12 | -2.80  | 0.024  |

## Online Supplementary Materials

|                |                                                               |       |       |       |        |
|----------------|---------------------------------------------------------------|-------|-------|-------|--------|
| <i>Pdpk1</i>   | 3-phosphoinositide dependent protein kinase-1                 | -2.65 | 0.30  | -3.14 | 0.011  |
| <i>Crebbp</i>  | CREB binding protein                                          | -2.63 | 0.30  | -3.15 | 0.0060 |
| <i>Fabp7</i>   | fatty acid binding protein 7, brain                           | -2.54 | 0.19  | -2.81 | 0.013  |
| <i>Ldha</i>    | lactate dehydrogenase A                                       | -2.51 | 0.22  | -2.69 | 0.0061 |
| <i>Fgr</i>     | Gardner-Rasheed feline sarcoma viral (v-fgr) oncogene homolog | -2.49 | 0.26  | -3.08 | 0.0086 |
| <i>Nr1h3</i>   | nuclear receptor subfamily 1, group H, member 3               | -2.47 | 0.31  | -3.00 | 0.0082 |
| <i>Tgs1</i>    | trimethylguanosine synthase homolog ( <i>S. cerevisiae</i> )  | -2.41 | 0.20  | -2.62 | 0.020  |
| <i>Rxra</i>    | retinoid X receptor alpha                                     | -2.40 | 0.18  | -2.68 | 0.0064 |
| <i>Hspd1</i>   | heat shock protein 1 (chaperonin)                             | -2.28 | 0.28  | -2.09 | 0.020  |
| <i>ApoE</i>    | apolipoprotein E                                              | -2.23 | 0.36  | -2.89 | 0.013  |
| <i>ApoA5</i>   | apolipoprotein A-V                                            | -2.18 | 0.53  | -3.35 | 0.0080 |
| <i>Med1</i>    | mediator complex subunit 1                                    | -2.15 | 0.27  | -2.65 | 0.020  |
| <i>Rxrg</i>    | retinoid X receptor gamma                                     | -2.13 | 0.37  | -2.68 | 0.011  |
| <i>Acox3</i>   | acyl-Coenzyme A oxidase 3, pristanoyl                         | -2.13 | 0.26  | -2.87 | 0.0070 |
| <i>Dgat1</i>   | diacylglycerol O-acyltransferase homolog 1 (mouse)            | -2.06 | 0.40  | -2.61 | 0.020  |
| <i>Slc27a1</i> | solute carrier family 27 (fatty acid transporter), member 1   | -1.97 | 0.30  | -1.18 | 0.63   |
| <i>Acsl4</i>   | acyl-CoA synthetase long-chain family member 4                | -1.93 | 0.42  | -2.61 | 0.019  |
| <i>Fabp4</i>   | fatty acid binding protein 4, adipocyte                       | -1.87 | 0.47  | -2.87 | 0.0080 |
| <i>Ncoa6</i>   | nuclear receptor coactivator 6                                | -1.82 | 0.49  | -2.69 | 0.011  |
| <i>Creb1</i>   | CAMP responsive element binding protein 1                     | -1.78 | 0.35  | -2.38 | 0.0090 |
| <i>Pck1</i>    | phosphoenolpyruvate carboxykinase 1 (soluble)                 | -1.74 | 0.53  | -2.54 | 0.019  |
| <i>Pltp</i>    | phospholipid transfer protein                                 | -1.71 | 0.41  | -2.32 | 0.045  |
| <i>Rxrb</i>    | retinoid X receptor beta                                      | -1.69 | 0.42  | -2.01 | 0.069  |
| <i>Ncoa3</i>   | nuclear receptor coactivator 3                                | -1.69 | 0.45  | -2.15 | 0.036  |
| <i>Cd36</i>    | CD36 molecule (thrombospondin receptor)                       | -1.63 | 0.65  | -1.84 | 0.26   |
| <i>Gk</i>      | glycerol kinase                                               | -1.61 | 0.65] | -2.85 | 0.014  |

### Online Supplementary Materials

|                |                                                                                                         |       |      |       |        |
|----------------|---------------------------------------------------------------------------------------------------------|-------|------|-------|--------|
| <i>Pprc1</i>   | peroxisome proliferator-activated<br>receptor gamma, coactivator-related 1                              | -1.56 | 0.94 | -1.88 | 0.44   |
| <i>Lpl</i>     | lipoprotein lipase                                                                                      | -1.50 | 0.85 | -2.22 | 0.13   |
| <i>Src</i>     | v-src sarcoma (Schmidt-Ruppin A-2)<br>viral oncogene homolog (avian)                                    | -1.48 | 0.44 | -2.08 | 0.017  |
| <i>Sorbs1</i>  | sorbin and SH3 domain containing 1                                                                      | -1.48 | 0.35 | -1.98 | 0.0096 |
| <i>Fabp3</i>   | fatty acid binding protein 3, muscle<br>and heart                                                       | -1.41 | 0.44 | -1.45 | 0.74   |
| <i>Slc27a4</i> | solute carrier family 27 (fatty acid<br>transporter), member 4                                          | -1.26 | 0.79 | -1.69 | 0.16   |
| <i>Rplp1</i>   | ribosomal protein, large, P1                                                                            | -1.19 | 0.93 | -1.84 | 0.067  |
| <i>Smarcd3</i> | SWI/SNF related, matrix associated,<br>actin dependent regulator of chromatin,<br>subfamily d, member 3 | -1.14 | 0.56 | -1.29 | 0.24   |
| <i>Cyp7a1</i>  | cytochrome P450, family 7, subfamily<br>a, polypeptide 1                                                | -1.11 | 0.80 | -2.94 | 0.023  |
| <i>Mmp9</i>    | matrix metalloproteinase 9                                                                              | -1.05 | 0.36 | -1.05 | 0.042  |
| <i>Olr1</i>    | oxidized low density lipoprotein<br>(lectin-like) receptor 1                                            | -1.04 | 0.36 | -1.04 | 0.042  |
| <i>Pyy</i>     | peptide YY (mapped)                                                                                     | -1.04 | 0.36 | -1.04 | 0.042  |
| <i>Pparg</i>   | peroxisome proliferator-activated<br>receptor gamma                                                     | 1.25  | 0.40 | -1.70 | 0.16   |
| <i>Cpt1b</i>   | carnitine palmitoyltransferase 1b,<br>muscle                                                            | 1.38  | 0.42 | 1.03  | 0.73   |
| <i>Pck2</i>    | phosphoenolpyruvate carboxykinase 2<br>(mitochondrial)                                                  | 1.43  | 0.35 | -1.90 | 0.091  |
| <i>Ucp1</i>    | uncoupling protein 1 (mitochondrial,<br>proton carrier)                                                 | 1.66  | 0.36 | 1.16  | 0.63   |

FC: fold change; *P*: statistical significance analyzed by T test was set at 0.05.



## Online Supplementary Materials

**Supplementary Table S4. The amino acid compositions of the protein powders**

| %   | Casein <sup>1</sup> | Soy                     | Pork                    | Beef                    | Chicken                 | Fish                    |
|-----|---------------------|-------------------------|-------------------------|-------------------------|-------------------------|-------------------------|
| Met | 2.6                 | 1.34±0.06 <sup>a</sup>  | 2.89±0.09 <sup>b</sup>  | 2.78±0.13 <sup>b</sup>  | 2.86±0.23 <sup>b</sup>  | 2.99±0.01 <sup>b</sup>  |
| Lys | 7.4                 | 5.67±0.21 <sup>a</sup>  | 8.47±0.29 <sup>b</sup>  | 8.75±0.11 <sup>bc</sup> | 8.67±0.58 <sup>bc</sup> | 9.10±0.09 <sup>c</sup>  |
| Pro | 11.7                | 4.42±0.21 <sup>d</sup>  | 3.21±0.12 <sup>bc</sup> | 3.43±0.04 <sup>c</sup>  | 2.90±0.19 <sup>a</sup>  | 2.98±0.03 <sup>ab</sup> |
| Val | 5.7                 | 3.06±0.17 <sup>a</sup>  | 3.17±0.19 <sup>b</sup>  | 3.12±0.07 <sup>b</sup>  | 2.90±0.28 <sup>b</sup>  | 3.06±0.06 <sup>b</sup>  |
| Thr | 3.8                 | 3.43±0.20 <sup>a</sup>  | 4.48±0.20 <sup>b</sup>  | 4.53±0.11 <sup>b</sup>  | 4.30±0.27 <sup>b</sup>  | 4.30±0.03 <sup>b</sup>  |
| Arg | 3.6                 | 7.01±0.44 <sup>b</sup>  | 6.30±0.36 <sup>a</sup>  | 6.43±0.12 <sup>ab</sup> | 6.27±0.41 <sup>a</sup>  | 5.94±0.10 <sup>a</sup>  |
| Asp | 6.5                 | 10.23±0.45 <sup>c</sup> | 9.08±0.36 <sup>ab</sup> | 9.11±0.14 <sup>ab</sup> | 9.00±0.62 <sup>a</sup>  | 9.78±0.03 <sup>bc</sup> |
| Gly | 1.8                 | 3.74±0.16 <sup>a</sup>  | 3.96±0.18 <sup>ab</sup> | 4.15±0.14 <sup>bc</sup> | 3.76±0.23 <sup>a</sup>  | 4.33±0.05 <sup>c</sup>  |
| Ser | 5.4                 | 4.60±0.32 <sup>b</sup>  | 3.79±0.23 <sup>a</sup>  | 3.82±0.14 <sup>a</sup>  | 3.71±0.16 <sup>a</sup>  | 3.88±0.09 <sup>a</sup>  |
| Phe | 5                   | 4.70±0.16 <sup>b</sup>  | 3.89±0.14 <sup>a</sup>  | 3.92±0.04 <sup>a</sup>  | 3.79±0.29 <sup>a</sup>  | 3.99±0.04 <sup>a</sup>  |
| Ile | 4.8                 | 3.90±0.10 <sup>a</sup>  | 4.33±0.09 <sup>ab</sup> | 4.39±0.09 <sup>b</sup>  | 4.33±0.48 <sup>ab</sup> | 4.10±0.10 <sup>ab</sup> |
| Leu | 8.8                 | 7.16±0.21 <sup>a</sup>  | 7.98±0.23 <sup>b</sup>  | 8.07±0.07 <sup>b</sup>  | 7.75±0.72 <sup>ab</sup> | 7.88±0.17 <sup>b</sup>  |
| Cys | 0.4                 | 1.36±0.11 <sup>b</sup>  | 0.86±0.08 <sup>a</sup>  | 0.92±0.27 <sup>a</sup>  | 0.76±0.11 <sup>a</sup>  | 0.88±0.02 <sup>a</sup>  |
| Glu | 20.8                | 18.22±1.34 <sup>b</sup> | 15.47±1.03 <sup>a</sup> | 16.12±0.74 <sup>a</sup> | 14.94±0.58 <sup>a</sup> | 15.35±0.45 <sup>a</sup> |
| Ala | 2.6                 | 3.85±0.17 <sup>a</sup>  | 5.46±0.23 <sup>b</sup>  | 5.64±0.07 <sup>b</sup>  | 5.47±0.34 <sup>b</sup>  | 5.65±0.03 <sup>b</sup>  |
| Tyr | 5.3                 | 4.14±0.16 <sup>a</sup>  | 4.64±0.16 <sup>a</sup>  | 4.58±0.07 <sup>a</sup>  | 4.60±0.30 <sup>a</sup>  | 4.58±0.02 <sup>a</sup>  |
| His | 2.6                 | 2.32±0.09 <sup>a</sup>  | 3.66±0.14 <sup>c</sup>  | 3.00±0.02 <sup>b</sup>  | 2.90±0.20 <sup>b</sup>  | 2.41±0.01 <sup>a</sup>  |

<sup>1</sup> values for casein were obtained from the company Dyets Inc. (Bethlehem, PA).

Values are shown as means ± SD. Different superscripts mean statistically significant difference at  $P < 0.05$  tested by one-way ANOVA and LSD multiple comparisons.

## Online Supplementary Materials

**Supplementary Table S5. The amino acid compositions of the diets**

| %   | AIN-93G                | Soy                    | Pork                    | Beef                    | Chicken                 | Fish                    |
|-----|------------------------|------------------------|-------------------------|-------------------------|-------------------------|-------------------------|
| Ala | 0.62±0.01 <sup>a</sup> | 0.76±0.01 <sup>b</sup> | 1.06±0.01 <sup>c</sup>  | 1.13±0.02 <sup>d</sup>  | 1.09±0.02 <sup>c</sup>  | 1.12±0.01 <sup>d</sup>  |
| Arg | 0.71±0.01 <sup>a</sup> | 1.31±0.02 <sup>d</sup> | 1.15±0.02 <sup>b</sup>  | 1.23±0.02 <sup>c</sup>  | 1.2±0.02 <sup>c</sup>   | 1.13±0.00 <sup>b</sup>  |
| Asp | 1.42±0.02 <sup>a</sup> | 2.03±0.03 <sup>e</sup> | 1.77±0.01 <sup>b</sup>  | 1.84±0.03 <sup>c</sup>  | 1.79±0.04 <sup>b</sup>  | 1.95±0.02 <sup>d</sup>  |
| Cys | 0.37±0.03 <sup>c</sup> | 0.22±0.01 <sup>b</sup> | 0.15±0.01 <sup>a</sup>  | 0.14±0.01 <sup>a</sup>  | 0.15±0.00 <sup>a</sup>  | 0.15±0.01 <sup>a</sup>  |
| Glu | 4.85±0.09 <sup>d</sup> | 3.81±0.05 <sup>c</sup> | 3.16±0.07 <sup>a</sup>  | 3.44±0.05 <sup>b</sup>  | 3.15±0.06 <sup>a</sup>  | 3.25±0.03 <sup>a</sup>  |
| Gly | 0.37±0.01 <sup>a</sup> | 0.74±0.01 <sup>b</sup> | 0.78±0.01 <sup>c</sup>  | 0.83±0.01 <sup>d</sup>  | 0.75±0.01 <sup>b</sup>  | 0.87±0.01 <sup>e</sup>  |
| His | 0.55±0.01 <sup>c</sup> | 0.45±0.01 <sup>a</sup> | 0.69±0.01 <sup>e</sup>  | 0.59±0.01 <sup>d</sup>  | 0.56±0.01 <sup>c</sup>  | 0.47±0.00 <sup>b</sup>  |
| Ile | 0.97±0.02 <sup>e</sup> | 0.78±0.02 <sup>a</sup> | 0.85±0.01 <sup>bc</sup> | 0.89±0.02 <sup>d</sup>  | 0.86±0.02 <sup>cd</sup> | 0.83±0.01 <sup>b</sup>  |
| Leu | 1.92±0.03 <sup>d</sup> | 1.47±0.02 <sup>a</sup> | 1.6±0.02 <sup>b</sup>   | 1.69±0.02 <sup>c</sup>  | 1.6±0.03 <sup>b</sup>   | 1.63±0.02 <sup>b</sup>  |
| Lys | 1.57±0.02 <sup>b</sup> | 1.07±0.02 <sup>a</sup> | 1.6±0.00 <sup>b</sup>   | 1.69±0.03 <sup>c</sup>  | 1.66±0.03 <sup>c</sup>  | 1.76±0.01 <sup>d</sup>  |
| Met | 0.54±0.00 <sup>c</sup> | 0.25±0.01 <sup>a</sup> | 0.51±0.01 <sup>b</sup>  | 0.53±0.01 <sup>c</sup>  | 0.51±0.01 <sup>b</sup>  | 0.54±0.00 <sup>c</sup>  |
| Phe | 1.01±0.01 <sup>e</sup> | 0.95±0.02 <sup>d</sup> | 0.77±0.01 <sup>a</sup>  | 0.85±0.01 <sup>c</sup>  | 0.77±0.01 <sup>a</sup>  | 0.82±0.01 <sup>b</sup>  |
| Pro | 2.16±0.01 <sup>e</sup> | 0.92±0.01 <sup>d</sup> | 0.67±0.03 <sup>b</sup>  | 0.74±0.00 <sup>c</sup>  | 0.64±0.02 <sup>a</sup>  | 0.64±0.01 <sup>a</sup>  |
| Thr | 0.87±0.01 <sup>b</sup> | 0.69±0.01 <sup>a</sup> | 0.88±0.00 <sup>b</sup>  | 0.92±0.02 <sup>c</sup>  | 0.87±0.02 <sup>b</sup>  | 0.86±0.01 <sup>b</sup>  |
| Ser | 1.17±0.01 <sup>d</sup> | 0.94±0.01 <sup>c</sup> | 0.77±0.00 <sup>a</sup>  | 0.79±0.01 <sup>b</sup>  | 0.77±0.02 <sup>a</sup>  | 0.80±0.01 <sup>b</sup>  |
| Tyr | 0.80±0.01 <sup>c</sup> | 0.45±0.01 <sup>b</sup> | 0.41±0.02 <sup>a</sup>  | 0.44±0.03 <sup>ab</sup> | 0.41±0.01 <sup>a</sup>  | 0.44±0.00 <sup>ab</sup> |
| Val | 1.24±0.03 <sup>c</sup> | 0.80±0.02 <sup>a</sup> | 0.89±0.01 <sup>b</sup>  | 0.90±0.02 <sup>b</sup>  | 0.89±0.01 <sup>b</sup>  | 0.90±0.00 <sup>b</sup>  |

Values are shown as means ± SD. Different letters mean statistically significant difference at  $P < 0.05$  tested by one-way ANOVA and LSD multiple comparisons.

## Online Supplementary Materials

**Supplementary Table S6. Amino acid ratios<sup>1</sup> of soy and meat proteins using casein+1.5%Cys (AIN93G) as the reference protein**

| %                 | Soy | Meat <sup>2</sup> | Pork | Beef | Chicken | Fish |
|-------------------|-----|-------------------|------|------|---------|------|
| Met               | 52  | 111               | 111  | 107  | 110     | 115  |
| Val               | 54  | 54                | 56   | 55   | 51      | 54   |
| Ile               | 81  | 89                | 90   | 91   | 90      | 85   |
| Leu               | 81  | 90                | 91   | 92   | 88      | 90   |
| BCAA <sup>3</sup> | 73  | 79                | 80   | 81   | 78      | 78   |
| Lys               | 77  | 118               | 114  | 118  | 117     | 123  |
| His               | 89  | 115               | 141  | 115  | 112     | 93   |
| Thr               | 90  | 116               | 118  | 119  | 113     | 113  |
| Phe               | 94  | 78                | 78   | 78   | 76      | 80   |
| Arg               | 195 | 173               | 175  | 179  | 174     | 165  |

Amino acid ratios<sup>1</sup> (%) = (mg of an essential amino acid in 1.0 g of test protein/mg of the same amino acid in 1.0 g of (casein + 1.5% Cys)) ×100; Meat<sup>2</sup>: it was calculated by combining value of meat proteins from pork, beef, chicken and fish together. BCAA<sup>3</sup>: it was calculated by combining value of Val, Ile and Leu together.

## Online Supplementary Materials

### Supplementary Table S7. Mineral composition of the protein powders

| mg/K<br>g | Casein <sup>1</sup> | Soy                       | Pork                       | Beef                      | Chicken                   | Fish                       |
|-----------|---------------------|---------------------------|----------------------------|---------------------------|---------------------------|----------------------------|
| Ca        | 500.0               | 707.3±15.4 <sup>c</sup>   | 209.4±101.1 <sup>a</sup>   | 176.8±56.5 <sup>a</sup>   | 158.6±5.9 <sup>a</sup>    | 440.4±104.0 <sup>b</sup>   |
| Cu        | 4.0                 | 13.2±0.2 <sup>c</sup>     | 4.9±1.3 <sup>b</sup>       | 2.9±1.3 <sup>a</sup>      | 2.1±0.5 <sup>a</sup>      | 1.8±0.9 <sup>a</sup>       |
| Cr        | 0.8                 | 0.6±0.0                   | nd <sup>2</sup>            | 0.9±0.4                   | 0.8±0.1                   | 0.7±0.1                    |
| Fe        | 7.0                 | 150.4±7.6 <sup>c</sup>    | 35.7±1.9 <sup>a</sup>      | 78.0±25.6 <sup>b</sup>    | 20.3±5.5 <sup>a</sup>     | 18.0±2.2 <sup>a</sup>      |
| K         | 50.0                | 389.3±7.9 <sup>a</sup>    | 9944.0±125.4 <sup>d</sup>  | 4438.8±183.1 <sup>b</sup> | 6411.2±60.2 <sup>c</sup>  | 13375.5±267.6 <sup>e</sup> |
| Mg        | 30.0                | 405.6±3.7 <sup>a</sup>    | 983.2±30.3 <sup>c</sup>    | 676.8±32.6 <sup>b</sup>   | 1163.0±22.2 <sup>d</sup>  | 1187.8±35.6 <sup>d</sup>   |
| Mn        | 1.6                 | 11.4±0.1                  | 0.7±0.3                    | nd                        | 0.6±0.1                   | 0.8±0.1                    |
| Na        | 100.0               | 8184.9±142.8 <sup>d</sup> | 1192.4±202.4 <sup>c</sup>  | 486.0±108.2 <sup>a</sup>  | 685.0±101.1 <sup>ab</sup> | 848.2±56.8 <sup>b</sup>    |
| Ni        | 0.2                 | 1.6±0.4                   | 0.8±0.3                    | nd                        | 0.8±0.2                   | nd                         |
| P         | 7500.0              | 6788.4±93.4 <sup>b</sup>  | 7217.4±351.7 <sup>cd</sup> | 4741.4±147.8 <sup>a</sup> | 7547.6±114.5 <sup>d</sup> | 7131.5±201.0 <sup>bc</sup> |
| Se        | 0.5                 | nd                        | 7.4±2.2                    | 3.9±0.7                   | 8.2±0.8                   | 7.8±0.9                    |
| Zn        | 38.0                | 43.9±14.0 <sup>a</sup>    | 86.8±14.2 <sup>b</sup>     | 161.5±11.6 <sup>c</sup>   | 44.4±2.5 <sup>a</sup>     | 27.6±3.3 <sup>a</sup>      |

Minerals in protein powders were detected using inductively coupled plasma optical emission spectrometer (PerkinElmer, Optima 2100 DV). Casein<sup>1</sup>: Value for casein was obtained from company Dyets Inc. (Bethlehem, PA); nd<sup>2</sup>: not detected. Values for soy and meat proteins are shown as means ± SD. Different superscripts mean statistically significant difference at  $P < 0.05$  tested by one-way ANOVA and LSD multiple comparisons.

## Online Supplementary Materials

**Supplementary Table S8. Ingredient composition of mineral mixes of the six diets**

| Ingredients, g/Kg                                 | Casein  | Soy     | Pork    | Beef    | Chicken | Fish    |
|---------------------------------------------------|---------|---------|---------|---------|---------|---------|
| calcium carbonate, anhydrous, Ca 40.04%           | 357.00  | 390.17  | 320.43  | 326.06  | 371.41  | 268.99  |
| potassium dihydrogen phosphate, P 22.76% K 28.73% | 196.00  | 208.48  | 113.59  | 209.56  | 182.48  | 38.50   |
| calcium phosphate, Ca 23.29% P 18.00%             | 0.00    | 0.00    | 166.18  | 90.08   | 54.27   | 274.10  |
| potassium Citrate, K 36.16%                       | 70.78   | 78.37   | 0.00    | 0.00    | 0.00    | 0.00    |
| sodium chloride, Na 39.34%                        | 74.00   | 0.00    | 68.16   | 71.80   | 73.42   | 76.24   |
| potassium sulphate, S 18.39% K 44.87%             | 46.60   | 51.61   | 53.83   | 48.79   | 51.91   | 55.78   |
| magnesium oxide, Mg 60.32%                        | 24.00   | 22.02   | 17.85   | 18.90   | 15.29   | 16.22   |
| iron citrate, Fe 16.5%                            | 6.06    | 0.00    | 0.00    | 0.00    | 0.00    | 0.00    |
| zinc carbonate, Zn 52.14%                         | 1.65    | 1.67    | 1.34    | 0.35    | 1.77    | 2.12    |
| manganous carbonate, Mn 47.79%                    | 0.63    | 0.54    | 0.74    | 0.68    | 0.71    | 0.76    |
| curpic carbonate, Cu 57.47%                       | 0.30    | 0.21    | 0.34    | 0.32    | 0.35    | 0.38    |
| potassium iodate, I 59.3%                         | 0.01    | 0.01    | 0.01    | 0.01    | 0.01    | 0.01    |
| sodium selenate, Se 41.79%                        | 0.01025 | 0.01025 | 0.00000 | 0.00000 | 0.00000 | 0.00000 |
| ammonium paramolybdate, 4 hydrate, Mo 54.34%      | 0.00795 | 0.00880 | 0.00918 | 0.00832 | 0.00886 | 0.00952 |
| sodium meta-silicate, 9 hydrate, Si 9.88%         | 1.45    | 1.61    | 1.67    | 1.52    | 1.62    | 1.74    |
| chromium potassium sulfate, 12 hydrate, Cr 10.42% | 0.275   | 0.305   | 0.318   | 0.288   | 0.306   | 0.329   |
| lithium chloride, Li 16.38%                       | 0.0174  | 0.0193  | 0.0201  | 0.0182  | 0.0194  | 0.0208  |
| boric acid, B 17.5%                               | 0.0815  | 0.0903  | 0.0941  | 0.0853  | 0.0908  | 0.0976  |
| sodium fluoride, F 45.24%                         | 0.0635  | 0.0703  | 0.0733  | 0.0665  | 0.0707  | 0.0760  |
| nickel carbonate, Ni 45%                          | 0.0318  | 0.0352  | 0.0367  | 0.0333  | 0.0354  | 0.0381  |
| ammonium vanadate, V 43.55%                       | 0.0066  | 0.0073  | 0.0076  | 0.0069  | 0.0074  | 0.0079  |
| suger                                             | 221.026 | 244.772 | 255.311 | 231.420 | 246.216 | 264.566 |
| total                                             | 1000.00 | 1000.00 | 1000.00 | 1000.00 | 1000.00 | 1000.00 |
